# Supplementary material
Source: PubMed Central journal article supplement (PMC8244830)
Supplement: NIHMS1708255-supplement-sm.pdf [file NIHMS1708255-supplement-sm.pdf]

## Supplementary Materials

### **Circulating Liver Function Markers and Colorectal Cancer Risk: A Prospective Cohort Study in the UK Biobank**

Ming-ming He, Zhe Fang, Dong Hang, Feng Wang, Georgios Polychronidis, Liang Wang, Chun-Han Lo, Kai Wang, Rong Zhong, Markus D Knudsen, Scott G. Smith, Rui-Hua Xu, Mingyang Song

#### **Contents**

|                                    |          |
|------------------------------------|----------|
| <b>Supplementary Figures .....</b> | <b>2</b> |
| Supplementary Figure 1 .....       | 2        |
| <b>Supplementary Tables .....</b>  | <b>3</b> |
| Supplementary Table 1.....         | 3        |
| Supplementary Table 2.....         | 4        |
| Supplementary Table 3.....         | 5        |
| Supplementary Table 4.....         | 6        |
| Supplementary Table 5.....         | 8        |

## Supplementary Figures

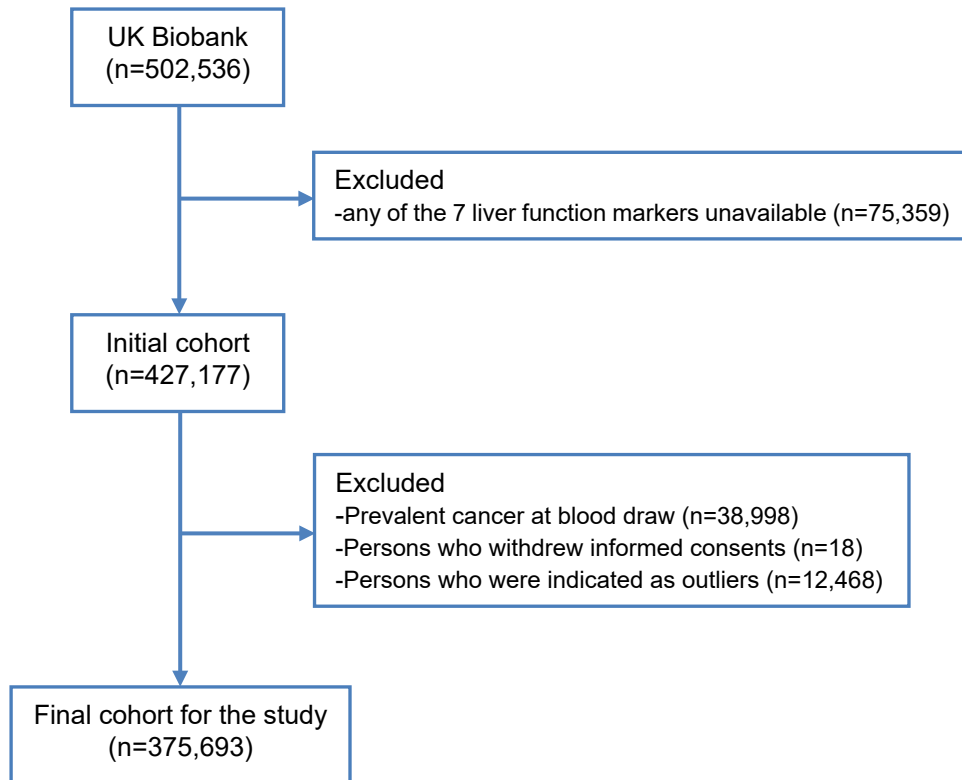

**Supplementary Figure 1. Flow chart of participant selection in the UK Biobank**

## Supplementary Tables

**Supplementary Table 1. Normal range for circulating liver function markers and the percentage of our study participants within the normal range <sup>a</sup>**

| Biomarker                       | Normal range | Percentage of participants within the normal range |
|---------------------------------|--------------|----------------------------------------------------|
| Alanine transaminase (ALT)      | 7-52 U/L     | 97%                                                |
| Aspartate transaminase (AST)    | 13-39 U/L    | 96%                                                |
| Total bilirubin (TBIL)          | 5-17 µmol/L  | 89%                                                |
| Gamma glutamyltransferase (GGT) | 9-64 U/L     | 91%                                                |
| Alkaline phosphatase (ALP)      | 34-104 U/L   | 85%                                                |
| Total Protein (TP)              | 64-89 g/L    | 99%                                                |
| Albumin (ALB)                   | 35-57 g/L    | 100%                                               |

<sup>a</sup> Normal range is based on Beckman Coulter AU5800 determined reference range for circulating liver function markers (<https://www.beckmancoulter.com/support/tech-docs>).

**Supplementary Table 2. Intraclass correlation coefficients of circulating liver function markers measured in repeated samples <sup>a</sup>**

|                                 | Intraclass correlation coefficient<br>(95% confidence interval) |
|---------------------------------|-----------------------------------------------------------------|
| Alanine transaminase (ALT)      | 0.51 (0.49-0.52)                                                |
| Aspartate transaminase (AST)    | 0.49 (0.48-0.51)                                                |
| Total bilirubin (TBIL)          | 0.74 (0.73-0.75)                                                |
| Gamma glutamyltransferase (GGT) | 0.62 (0.60-0.63)                                                |
| Alkaline phosphatase (ALP)      | 0.75 (0.74-0.76)                                                |
| Total Protein (TP)              | 0.50 (0.48-0.51)                                                |
| Albumin (ALB)                   | 0.48 (0.47-0.50)                                                |

<sup>a</sup> Intraclass correlation coefficients were calculated in the subsample of participants with repeat measurements of circulating liver function markers after excluding the cancer patients diagnosed between two repeat measurements (n=11320).

**Supplementary Table 3. Hazard ratios (95% confidence intervals) of early-, mid-, and late-onset colorectal cancer associated with circulating levels of liver function markers <sup>a</sup>**

|                                        | Early-onset CRC<br>(age<50 years)<br>(n=93) | Mid-onset CRC<br>(50≤age<60 years)<br>(n=509) | Late-onset CRC<br>(age≥60 years)<br>(n=2060) | <i>P</i> for<br>heterogeneity <sup>b</sup> |
|----------------------------------------|---------------------------------------------|-----------------------------------------------|----------------------------------------------|--------------------------------------------|
| <b>Alanine transaminase (ALT)</b>      |                                             |                                               |                                              |                                            |
| HR (95% CI), decile 10 vs. 1           | 0.65 (0.28-1.54)                            | 0.68 (0.45-1.02)                              | 0.63 (0.50-0.79)                             | 0.94                                       |
| HR (95% CI), per 1-SD increment        | 0.96 (0.77-1.21)                            | 0.91 (0.83-1.00)                              | 0.88 (0.83-0.92)                             | 0.60                                       |
| <b>Aspartate transaminase (AST)</b>    |                                             |                                               |                                              |                                            |
| HR (95% CI), decile 10 vs. 1           | 1.02 (0.45-2.31)                            | 0.68 (0.46-1.01)                              | 0.62 (0.50-0.77)                             | 0.48                                       |
| HR (95% CI), per 1-SD increment        | 0.96 (0.76-1.20)                            | 0.94 (0.85-1.03)                              | 0.91 (0.87-0.96)                             | 0.81                                       |
| <b>Total bilirubin (TBIL)</b>          |                                             |                                               |                                              |                                            |
| HR (95% CI), decile 10 vs. 1           | 0.57 (0.23-1.41)                            | 1.16 (0.80-1.70)                              | 0.79 (0.65-0.97)                             | 0.15                                       |
| HR (95% CI), per 1-SD increment        | 0.88 (0.70-1.11)                            | 1.05 (0.96-1.14)                              | 0.96 (0.92-1.01)                             | 0.18                                       |
| <b>Gamma glutamyltransferase (GGT)</b> |                                             |                                               |                                              |                                            |
| HR (95% CI), decile 10 vs. 1           | 1.23 (0.43-3.50)                            | 0.60 (0.40-0.90)                              | 0.78 (0.62-0.97)                             | 0.35                                       |
| HR (95% CI), per 1-SD increment        | 0.99 (0.77-1.25)                            | 0.95 (0.86-1.04)                              | 0.99 (0.94-1.03)                             | 0.77                                       |
| <b>Alkaline phosphatase (ALP)</b>      |                                             |                                               |                                              |                                            |
| HR (95% CI), decile 10 vs. 1           | 3.42 (1.28-9.10)                            | 1.03 (0.71-1.50)                              | 1.02 (0.84-1.25)                             | 0.06                                       |
| HR (95% CI), per 1-SD increment        | 1.11 (0.88-1.40)                            | 1.07 (0.97-1.17)                              | 1.01 (0.96-1.05)                             | 0.40                                       |
| <b>Total Protein (TP)</b>              |                                             |                                               |                                              |                                            |
| HR (95% CI), decile 10 vs. 1           | 0.31 (0.12-0.79)                            | 0.72 (0.48-1.08)                              | 0.73 (0.60-0.89)                             | 0.21                                       |
| HR (95% CI), per 1-SD increment        | 0.78 (0.63-0.97)                            | 0.95 (0.86-1.04)                              | 0.91 (0.87-0.95)                             | 0.26                                       |
| <b>Albumin (ALB)</b>                   |                                             |                                               |                                              |                                            |
| HR (95% CI), decile 10 vs. 1           | 0.54 (0.22-1.33)                            | 0.57 (0.37-0.87)                              | 0.71 (0.58-0.88)                             | 0.57                                       |
| HR (95% CI), per 1-SD increment        | 0.89 (0.72-1.10)                            | 0.87 (0.80-0.96)                              | 0.92 (0.88-0.96)                             | 0.65                                       |

Abbreviations: CI=Confidence interval; CRC=Colorectal cancer; HR=Hazard ratio; SD=Standard deviation.

<sup>a</sup> Multivariable Cox regression model with age as the underlying time scale was used and adjusted for sex, race (white, non-white, unknown), fasting status, age at recruitment, Townsend deprivation index (continuous), waist circumference / hip circumference (continuous), height (continuous), BMI (continuous), C-reactive protein (continuous), total physical activity (quintile), alcohol status and consumption frequency (never, former, current- special occasions only, current- 1-3 times per month, current- 1-2 times per week, current- 3-4 times per week, current- daily/almost daily, unknown), smoking status and intensity (never, former, current- <15 per day, current- ≥15 per day, current- intensity unknown, unknown), frequency of red and processed meat consumption (never, <1, =1, 2-4, 5-6, ≥7 occasions per week, unknown), frequency of oily fish consumption (never, <1, =1, 2-4, 5-6, ≥7 occasions per week, unknown), family history of cancer (no, yes, unknown), educational level (college/university degree, non-college/university degree, unknown), regular aspirin use (no, yes, unknown), bowel cancer screening (no, yes, unknown), and overall health ranking (excellent, good, fair, poor, unknown).

<sup>b</sup> *P* for heterogeneity was calculated using the contrast method using the contrast method based on a fully unconstrained approach.

**Supplementary Table 4. Stratified analyses of the association between circulating levels of liver function markers and colorectal cancer risk in the UK Biobank <sup>a</sup>**

|                                       | No. of<br>CRC<br>cases | ALT              | AST              | TBIL             | GGT              | ALP              | TP               | ALB              |
|---------------------------------------|------------------------|------------------|------------------|------------------|------------------|------------------|------------------|------------------|
| Age at recruitment                    |                        |                  |                  |                  |                  |                  |                  |                  |
| <60                                   | 917                    | 0.89 (0.83-0.96) | 0.91 (0.84-0.97) | 1.04 (0.98-1.11) | 0.96 (0.89-1.03) | 1.06 (0.99-1.14) | 0.94 (0.88-1.00) | 0.90 (0.84-0.96) |
| ≥60                                   | 1745                   | 0.88 (0.83-0.93) | 0.92 (0.88-0.97) | 0.94 (0.89-0.99) | 0.99 (0.94-1.04) | 0.99 (0.95-1.05) | 0.89 (0.85-0.94) | 0.91 (0.87-0.96) |
| <i>P</i> for interaction <sup>b</sup> |                        | 0.73             | 0.66             | 0.10             | 0.26             | 0.04             | 0.14             | 0.78             |
| Sex                                   |                        |                  |                  |                  |                  |                  |                  |                  |
| Women                                 | 1127                   | 0.86 (0.79-0.93) | 0.93 (0.87-0.99) | 0.97 (0.90-1.04) | 0.96 (0.89-1.03) | 1.00 (0.94-1.06) | 0.92 (0.86-0.97) | 0.88 (0.82-0.93) |
| Men                                   | 1535                   | 0.89 (0.85-0.95) | 0.91 (0.86-0.96) | 0.99 (0.94-1.04) | 0.98 (0.93-1.03) | 1.04 (0.98-1.09) | 0.90 (0.86-0.95) | 0.93 (0.88-0.98) |
| <i>P</i> for interaction <sup>b</sup> |                        | 0.07             | 0.88             | 0.81             | 0.10             | 0.17             | 0.60             | 0.31             |
| Smoking status                        |                        |                  |                  |                  |                  |                  |                  |                  |
| Never                                 | 1232                   | 0.89 (0.83-0.96) | 0.92 (0.87-0.98) | 0.98 (0.92-1.03) | 0.96 (0.90-1.02) | 1.03 (0.97-1.09) | 0.88 (0.83-0.93) | 0.86 (0.81-0.91) |
| Former                                | 1150                   | 0.86 (0.80-0.92) | 0.90 (0.84-0.96) | 0.97 (0.91-1.03) | 0.99 (0.93-1.05) | 1.00 (0.94-1.06) | 0.93 (0.87-0.98) | 0.92 (0.86-0.98) |
| Current                               | 264                    | 0.97 (0.84-1.12) | 0.99 (0.88-1.13) | 1.15 (1.01-1.31) | 0.97 (0.86-1.10) | 1.01 (0.89-1.14) | 1.00 (0.88-1.13) | 1.10 (0.97-1.25) |
| <i>P</i> for interaction <sup>b</sup> |                        | 0.57             | 0.42             | 0.10             | 0.32             | 0.30             | 0.17             | 0.01             |
| Alcohol consumption                   |                        |                  |                  |                  |                  |                  |                  |                  |
| None                                  | 185                    | 0.86 (0.71-1.03) | 0.75 (0.63-0.90) | 0.98 (0.83-1.15) | 0.96 (0.80-1.13) | 1.06 (0.92-1.21) | 0.92 (0.80-1.07) | 0.89 (0.77-1.04) |
| Special occasions only                | 269                    | 0.84 (0.72-0.98) | 0.89 (0.78-1.01) | 0.94 (0.82-1.09) | 1.03 (0.90-1.17) | 0.92 (0.82-1.04) | 0.88 (0.78-1.00) | 0.90 (0.79-1.01) |
| 1-3 times per month                   | 244                    | 0.96 (0.83-1.11) | 0.99 (0.86-1.13) | 1.09 (0.96-1.23) | 1.09 (0.96-1.25) | 1.06 (0.93-1.20) | 0.94 (0.83-1.07) | 1.01 (0.89-1.15) |
| 1-2 times per week                    | 663                    | 0.84 (0.77-0.93) | 0.90 (0.83-0.98) | 0.95 (0.87-1.03) | 0.91 (0.83-1.00) | 0.98 (0.90-1.06) | 0.93 (0.86-1.01) | 0.89 (0.82-0.97) |
| 3-4 times per week                    | 617                    | 0.89 (0.81-0.98) | 0.90 (0.83-0.99) | 0.97 (0.89-1.06) | 0.98 (0.90-1.06) | 1.08 (0.99-1.18) | 0.88 (0.81-0.96) | 0.88 (0.81-0.96) |
| Daily / almost daily                  | 677                    | 0.88 (0.81-0.97) | 0.94 (0.87-1.02) | 1.00 (0.92-1.08) | 0.96 (0.89-1.03) | 0.99 (0.91-1.08) | 0.90 (0.83-0.97) | 0.91 (0.84-0.98) |
| <i>P</i> for interaction <sup>b</sup> |                        | 0.80             | 0.19             | 0.84             | 0.64             | 0.55             | 0.95             | 0.79             |
| Body mass index (kg/m <sup>2</sup> )  |                        |                  |                  |                  |                  |                  |                  |                  |
| <25                                   | 719                    | 0.82 (0.73-0.92) | 0.90 (0.82-0.99) | 0.99 (0.92-1.07) | 0.94 (0.85-1.03) | 1.03 (0.95-1.11) | 0.92 (0.86-1.00) | 0.85 (0.79-0.92) |
| ≥25                                   | 1943                   | 0.89 (0.85-0.93) | 0.92 (0.87-0.96) | 0.98 (0.93-1.02) | 0.98 (0.94-1.03) | 1.01 (0.96-1.06) | 0.90 (0.86-0.94) | 0.92 (0.88-0.97) |
| <i>P</i> for interaction <sup>b</sup> |                        | 0.10             | 0.41             | 0.88             | 0.22             | 0.51             | 0.44             | 0.10             |

Abbreviations: ALB=Albumin; ALP=Alkaline phosphatase; ALT=Alanine transaminase; AST=Aspartate transaminase; CRC=colorectal cancer; GGT=Gamma glutamyltransferase; TBIL=Total bilirubin; TP=Total Protein.

---

<sup>a</sup> Hazard ratios (95% confidence intervals) of colorectal cancer per 1-standard deviation increment in circulating levels of liver function markers in multivariable Cox regression model using age as the underlying time scale and adjusted for sex, race (white, non-white, unknown), fasting status, age at recruitment, Townsend deprivation index (continuous), waist circumference / hip circumference (continuous), height (continuous), BMI (continuous), C-reactive protein (continuous), total physical activity (quintile), alcohol status and consumption frequency (never, former, current- special occasions only, current- 1-3 times per month, current- 1-2 times per week, current- 3-4 times per week, current- daily/almost daily, unknown), smoking status and intensity (never, former, current- <15 per day, current- ≥15 per day, current- intensity unknown, unknown), frequency of red and processed meat consumption (never, <1, =1, 2-4, 5-6, ≥7 occasions per week, unknown), frequency of oily fish consumption (never, <1, =1, 2-4, 5-6, ≥7 occasions per week, unknown), family history of cancer (no, yes, unknown), educational level (college/university degree, non-college/university degree, unknown), regular aspirin use (no, yes, unknown), bowel cancer screening (no, yes, unknown), and overall health ranking (excellent, good, fair, poor, unknown) ).

<sup>b</sup> *P* for interaction was calculated using the likelihood ratio test for the product terms between these stratified variables and circulating levels of liver function markers.

**Supplementary Table 5. Sensitivity analyses of the association between circulating levels of liver function markers and colorectal cancer risk in the UK Biobank <sup>a</sup>**

|                                                                                                                  | No. of<br>CRC<br>cases | ALT              | AST              | TBIL             | GGT              | ALP              | TP               | ALB              |
|------------------------------------------------------------------------------------------------------------------|------------------------|------------------|------------------|------------------|------------------|------------------|------------------|------------------|
| The primary findings for the total cohort                                                                        |                        |                  |                  |                  |                  |                  |                  |                  |
| HR (95% CI), decile 10 vs. 1                                                                                     | 2662                   | 0.62 (0.51-0.75) | 0.63 (0.53-0.75) | 0.85 (0.72-1.02) | 0.74 (0.61-0.89) | 1.03 (0.87-1.23) | 0.70 (0.59-0.84) | 0.66 (0.55-0.79) |
| HR (95% CI) per 1-SD                                                                                             |                        | 0.88 (0.84-0.92) | 0.91 (0.88-0.95) | 0.98 (0.94-1.02) | 0.98 (0.94-1.02) | 1.02 (0.98-1.06) | 0.91 (0.88-0.95) | 0.90 (0.86-0.93) |
| Excluding the first two years of follow-up (n=1962)                                                              |                        |                  |                  |                  |                  |                  |                  |                  |
| HR (95% CI), decile 10 vs. 1                                                                                     | 2020                   | 0.72 (0.58-0.90) | 0.69 (0.56-0.85) | 1.04 (0.84-1.28) | 0.77 (0.62-0.96) | 1.01 (0.82-1.23) | 0.72 (0.59-0.89) | 0.68 (0.55-0.84) |
| HR (95% CI) per 1-SD                                                                                             |                        | 0.91 (0.86-0.96) | 0.93 (0.88-0.97) | 1.01 (0.97-1.06) | 0.99 (0.94-1.03) | 1.01 (0.97-1.06) | 0.92 (0.88-0.96) | 0.93 (0.88-0.97) |
| Excluding participants with abnormally low or high levels of circulating liver function markers (n=44987)        |                        |                  |                  |                  |                  |                  |                  |                  |
| HR (95% CI), decile 10 vs. 1                                                                                     | 2305                   | 0.57 (0.45-0.72) | 0.57 (0.46-0.71) | 0.85 (0.70-1.03) | 0.74 (0.59-0.94) | 1.08 (0.88-1.32) | 0.70 (0.58-0.86) | 0.62 (0.50-0.75) |
| HR (95% CI) per 1-SD                                                                                             |                        | 0.83 (0.78-0.88) | 0.85 (0.80-0.90) | 0.97 (0.93-1.02) | 0.92 (0.86-0.99) | 1.01 (0.96-1.06) | 0.90 (0.86-0.94) | 0.89 (0.85-0.93) |
| Excluding participants with inflammatory bowel disease at recruitment (n=2480) <sup>b</sup>                      |                        |                  |                  |                  |                  |                  |                  |                  |
| HR (95% CI), decile 10 vs. 1                                                                                     | 2637                   | 0.63 (0.52-0.76) | 0.63 (0.52-0.75) | 0.87 (0.73-1.04) | 0.74 (0.61-0.90) | 1.03 (0.87-1.23) | 0.70 (0.59-0.84) | 0.67 (0.55-0.80) |
| HR (95% CI) per 1-SD                                                                                             |                        | 0.88 (0.84-0.92) | 0.91 (0.88-0.95) | 0.98 (0.94-1.03) | 0.98 (0.94-1.02) | 1.01 (0.97-1.05) | 0.91 (0.87-0.94) | 0.91 (0.87-0.95) |
| Excluding participants with hepatitis and other liver/hepatobiliary disease at recruitment (n=8748) <sup>b</sup> |                        |                  |                  |                  |                  |                  |                  |                  |
| HR (95% CI), decile 10 vs. 1                                                                                     | 2604                   | 0.61 (0.50-0.74) | 0.62 (0.52-0.74) | 0.85 (0.71-1.02) | 0.73 (0.60-0.89) | 1.02 (0.86-1.22) | 0.70 (0.59-0.84) | 0.65 (0.54-0.79) |
| HR (95% CI) per 1-SD                                                                                             |                        | 0.87 (0.83-0.92) | 0.91 (0.87-0.95) | 0.98 (0.94-1.02) | 0.97 (0.93-1.01) | 1.01 (0.97-1.05) | 0.91 (0.87-0.95) | 0.90 (0.87-0.94) |
| Excluding participants with cardiovascular disease at recruitment (n=42948) <sup>b</sup>                         |                        |                  |                  |                  |                  |                  |                  |                  |
| HR (95% CI), decile 10 vs. 1                                                                                     | 2254                   | 0.61 (0.49-0.75) | 0.63 (0.51-0.77) | 0.85 (0.70-1.03) | 0.75 (0.61-0.92) | 1.15 (0.96-1.40) | 0.72 (0.60-0.88) | 0.65 (0.53-0.79) |
| HR (95% CI) per 1-SD                                                                                             |                        | 0.87 (0.83-0.92) | 0.92 (0.88-0.96) | 0.98 (0.93-1.02) | 0.97 (0.93-1.02) | 1.03 (0.99-1.08) | 0.91 (0.87-0.95) | 0.90 (0.86-0.94) |
| Excluding participants with diabetes at recruitment (n=7421) <sup>b</sup>                                        |                        |                  |                  |                  |                  |                  |                  |                  |
| HR (95% CI), decile 10 vs. 1                                                                                     | 2584                   | 0.61 (0.50-0.74) | 0.62 (0.52-0.75) | 0.84 (0.71-1.01) | 0.73 (0.60-0.88) | 1.06 (0.88-1.26) | 0.71 (0.59-0.85) | 0.65 (0.54-0.78) |
| HR (95% CI) per 1-SD                                                                                             |                        | 0.87 (0.83-0.92) | 0.91 (0.87-0.95) | 0.98 (0.94-1.02) | 0.97 (0.93-1.01) | 1.02 (0.98-1.06) | 0.91 (0.87-0.94) | 0.90 (0.86-0.94) |
| Adjustment for additional lifestyle factors for the total cohort <sup>c</sup>                                    |                        |                  |                  |                  |                  |                  |                  |                  |



|                              |      |                  |                  |                  |                  |                  |                  |                  |
|------------------------------|------|------------------|------------------|------------------|------------------|------------------|------------------|------------------|
| HR (95% CI), decile 10 vs. 1 |      | 0.62 (0.51-0.75) | 0.63 (0.52-0.75) | 0.84 (0.71-1.01) | 0.73 (0.61-0.89) | 1.02 (0.86-1.21) | 0.70 (0.59-0.84) | 0.66 (0.55-0.79) |
| HR (95% CI) per 1-SD         | 2662 | 0.88 (0.84-0.92) | 0.91 (0.87-0.95) | 0.98 (0.94-1.02) | 0.97 (0.93-1.01) | 1.01 (0.97-1.05) | 0.91 (0.87-0.94) | 0.90 (0.87-0.94) |

Abbreviations: ALB=Albumin; ALP=Alkaline phosphatase; ALT=Alanine transaminase; AST=Aspartate transaminase; CI=Confidence interval; CRC=Colorectal cancer; GGT=Gamma glutamyltransferase; HR=Hazard ratio; SD=Standard deviation; TBIL=Total bilirubin; TP=Total protein.

<sup>a</sup> Multivariable Cox regression model with age as the underlying time scale was used and adjusted for sex, race (white, non-white, unknown), fasting status, age at recruitment, Townsend deprivation index (continuous), waist circumference / hip circumference (continuous), height (continuous), BMI (continuous), C-reactive protein (continuous), total physical activity (quintile), alcohol status and consumption frequency (never, former, current- special occasions only, current- 1-3 times per month, current- 1-2 times per week, current- 3-4 times per week, current- daily/almost daily, unknown), smoking status and intensity (never, former, current- <15 per day, current- ≥15 per day, current- intensity unknown, unknown), frequency of red and processed meat consumption (never, <1, =1, 2-4, 5-6, ≥7 occasions per week, unknown), frequency of oily fish consumption (never, <1, =1, 2-4, 5-6, ≥7 occasions per week, unknown), family history of cancer (no, yes, unknown), educational level (college/university degree, non-college/university degree, unknown), regular aspirin use (no, yes, unknown), bowel cancer screening (no, yes, unknown), and overall health ranking (excellent, good, fair, poor, unknown) ).

<sup>b</sup> The diagnoses of inflammatory bowel disease, hepatitis and other liver disease and hepatobiliary disease, cardiovascular disease, and diabetes were all coded according to the 10th Revision of the International Classification of Diseases (ICD-10).

<sup>c</sup> Additional adjustment for raw vegetable intake (continuous), cooked vegetable intake (continuous), fresh fruit intake (continuous), dried fruit intake (continuous), frequency of poultry consumption (never, <1, =1, 2-4, 5-6, ≥7 occasions per week, unknown), coffee intake (continuous), vitamin supplements (any of vitamin A, vitamin B, vitamin C, vitamin D, vitamin E, folate, and multivitamins, or none), and mineral and other dietary supplements (any of calcium, zinc, iron, selenium, glucosamine, and fish oil, or none).
